# Supplementary material for: Species level mapping of a seagrass bed using an unmanned aerial vehicle and deep learning technique
Source: PeerJ. 2022 Oct 17;10:e14017. doi: 10.7717/peerj.14017 (PMC9583862; doi:10.7717/peerj.14017)
Supplement: Supplemental Information 1 — Raw data on the validation of ground-truth data based on in situ census. The file consists of metadata (Sheet 1) and data table (Sheet 2). [file peerj-10-14017-s001.xlsx]

## Sheet: MetaData
Column	Variables	Explanation
A	Quadrat	Quadrat id of in-situ field survey
B	Distance	Distance (m) along the transect from the shoreline
C	Direction	Position of quadrat placed: either north (N) or south (S) of the transect line
D	F-ZM	Percent cover of Zostera marina in the quadrat obtained by the in-situ field survey
E	F-ZJ	Percent cover of Zostera japonica in the quadrat obtained by the in-situ field survey
F	F-GA	Percent cover of green algae in the quadrat obtained by the in-situ field survey
G	F-BA	Percent cover of brown algae in the quadrat obtained by the in-situ field survey
H	F-RA	Percent cover of red algae in the quadrat obtained by the in-situ field survey
I	F-NV	Percent cover of non-vegetation area in the quadrat obtained by the in-situ field survey
J	G-ZM	Percent cover of Zostera marina in the quadrat analyzed by the ground-truth data made from UAV images
K	G-ZJ	Percent cover of Zostera japonica in the quadrat analyzed by the ground-truth data made from UAV images
L	G-GA	Percent cover of green algae in the quadrat analyzed by the ground-truth data made from UAV images
M	G-BA	Percent cover of brown algae in the quadrat analyzed by the ground-truth data made from UAV images
N	G-NV	Percent cover of non-vegetation area in the quadrat analyzed by the ground-truth data made from UAV images

## Sheet: RawData
Quadrat	Distance	Direction	F-ZM	F-ZJ	F-GA	F-BA	F-RA	F-NV	G-ZM	G-ZJ	G-GA	G-BA	G-NV
1	10	N	0	60	0	0	0	40	0	100	0	0	0
2	13.5	N	0	0	90	0	0	10	0	0	100	0	0
3	18	N	0	0	80	0	0	20	0	0	100	0	0
4	28	N	75	0	0	0	0	25	100	0	0	0	0
5	39	N	20	0	0	0	0	80	100	0	0	0	0
6	45.5	N	3	0	70	10	0	17	86	0	0	14	0
7	51	S	90	0	0	0	0	10	100	0	0	0	0
8	61	N	30	0	0	0	0	70	80	0	0	0	20
9	71	N	5	0	0	0	60	35	100	0	0	0	0
10	80	N	50	0	0	0	0	50	100	0	0	0	0
11	90.5	S	10	0	0	0	40	50	100	0	0	0	0
12	98.5	N	80	0	0	0	0	20	100	0	0	0	0
13	114.5	S	35	0	0	0	0	65	100	0	0	0	0
14	121	S	55	0	0	0	0	45	100	0	0	0	0
15	136.5	S	45	0	0	0	0	55	100	0	0	0	0
16	145	N	10	0	0	75	0	15	10	0	0	90	0
17	159.5	S	80	0	0	0	0	20	100	0	0	0	0
18	164.5	S	35	0	0	0	0	65	100	0	0	0	0
19	174.5	N	15	0	10	0	0	75	100	0	0	0	0
20	183.5	N	50	0	0	0	0	50	100	0	0	0	0
21	189.5	S	25	3	0	0	0	72	47	0	0	0	53
22	194.5	N	10	20	10	0	0	60	0	0	0	0	100
23	198	N	5	30	5	0	0	60	41	0	0	0	59
24	211.5	N	0	10	0	0	0	90	0	0	0	0	100
25	220.5	S	0	5	0	0	0	95	0	0	0	0	100
26	222	S	0	25	0	0	0	75	0	28	0	0	72
27	224	S	0	70	0	0	0	30	0	100	0	0	0
28	226.5	N	0	65	0	0	0	35	0	100	0	0	0
29	231.5	S	0	55	0	0	0	45	0	100	0	0	0
30	239	S	10	50	0	0	0	40	0	100	0	0	0
31	245	N	0	25	0	0	3	72	0	5	0	0	95
32	248.5	S	0	40	0	0	0	60	0	100	0	0	0
33	254.5	S	20	3	5	0	0	72	100	0	0	0	0
34	256.5	N	0	10	70	0	0	20	0	0	100	0	0
35	257.5	N	5	35	0	0	0	60	92	0	8	0	0
36	262.5	S	10	0	0	0	40	50	0	0	0	0	100
37	263.5	N	0	0	0	0	0	100	0	0	0	0	100
38	267.5	S	65	0	0	5	0	30	100	0	0	0	0
39	269.5	N	50	0	0	30	0	20	100	0	0	0	0
40	270	N	85	0	0	0	0	15	100	0	0	0	0
41	273.5	N	5	0	0	0	0	95	62	0	0	0	38
42	274	N	0	0	0	0	0	100	8	0	0	0	92
